# Supplementary material
Source: publisher site journal article supplement (https://www.dovepress.com/article/440942)
Supplement: Supplementary file 1 [file get_supplementary_file.php]

**Supplementary Material 1: RNOS**

**NEWCASTLE - OTTAWA QUALITY ASSESSMENT SCALE**

**(revised version for cross sectional studies)**

**Selection:** (Maximum 4 stars)

1) Representativeness of the sample:

a) Truly representative of the average in the target population. * (all subjects or random sampling)

b) Somewhat representative of the average in the target population. * (non-random sampling)

c) Selected group of users.

d) No description of the sampling strategy.

2) Sample size:

a) Justified and satisfactory. *

b) Adequately powered to detect a difference. *

c) Not justified.

3) Proportionate respondence:

a) The respondent sample was similar to the general population in terms of age, gender, education, etc *

b) The distribution of respondents’ demographic information is unsatisfactory.

c) No description of the respondents’ demographic information or the information was incomplete.

4) Ascertainment of the exposure (coronavirus outbreak):

a) Reported COVID-19 cases in the country by the time of investigation. *

b) No reported cases of COVID-19 in the country by the time of investigation.

**Comparability:** (Maximum 2 stars)

1) The subjects in different outcome groups are comparable, based on the study design or analysis. Confounding factors are controlled:

a) The study controls for the most important factor (select one). *

b) The study control for any additional factor. *

**Outcome:** (Maximum 5 stars)

1) Assessment of the outcome:

a) Structured interview with a trained psychiatrist/interviewer. **

b) Training before the self-reported survey. **

c) Self report without training. *

d) No description.

2) Assessing tools

a) Scales being tested of validity and reliability. **

b) Questionnaires adapted from existing survey tools but not tested for its applicability in the current study.*

c) Questionnaires without testing.

3) Statistical test:

a) The statistical test used to analyze the data is clearly described and appropriate, and the measurement of the association is presented, including confidence intervals and the probability level (p value). *

b) The statistical test is not appropriate, not described or incomplete.
